# Supplementary material for: Design and Rationale the SCAN‐MP (Screening for Cardiac Amyloidosis With Nuclear Imaging in Minority Populations) Study
Source: PubMed Central journal article supplement — J Am Heart Assoc. 2023 Apr 17;12(8):e028534. doi: 10.1161/JAHA.122.028534 (PMC10227254; doi:10.1161/jaha.122.028534), 2023-04-17
Supplement: JAH3-12-e028534-s001.pdf [file JAH3-12-e028534-s001.pdf]

# **Supplemental Material**

**Table S1. Specific recruitment targets by age, sex, and race and ethnicity.**

| <b>Age<br/>(yr)</b> | <b>Black</b> |          | <b>Hispanic or<br/>Latino<br/>ethnicity</b> |          | <b>Total</b> |          |
|---------------------|--------------|----------|---------------------------------------------|----------|--------------|----------|
|                     | <b>M</b>     | <b>F</b> | <b>M</b>                                    | <b>F</b> | <b>M</b>     | <b>F</b> |
| $\leq 75$           | 150          | 150      | 50                                          | 50       | 200          | 200      |
| $> 75$              | 150          | 150      | 50                                          | 50       | 200          | 200      |
